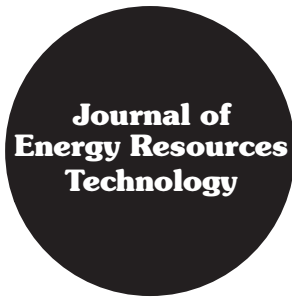

# Errata

## **Erratum: “Modeling and Simulation of PEM Fuel Cells With CO Poisoning” [ASME J. Energy Res. Technol., 125, No. 2, pp. 94–100]**

**Jeffrey J. Baschuk, Andrew M. Rowe, and Xianguo Li**

---

The contributed line should have read:

Contributed by the Advanced Energy Systems Division for publication in the JOURNAL OF ENERGY RESOURCES TECHNOLOGY. Manuscript received at the AES Division March 2002; revised manuscript received October 2002. Associate Editor: S. Somasundaram.

## **Erratum: “Experimental Studies on a Heat Pump Operating With R22, R407C and R407A: Comparison from an Exergy Point of View” [ASME J. Energy Res. Technol., 125, No. 2, pp. 101–112]**

**B. Rakesh, G. Venkatarathnam, and S. Srinivasa Murthy**

---

The contributed line should have read:

Contributed by the Advanced Energy Systems Division for publication in the JOURNAL OF ENERGY RESOURCES TECHNOLOGY. Manuscript received at the AES Division February 2002; revised manuscript received October 2002. Associate Editor: S. Somasundaram.
